# Supplementary material
Source: publisher site journal article supplement (https://www.dovepress.com/article/295114)
Supplement: Supplementary file 1 [file get_supplementary_file.php]

**Supplementary materials**

Supplementary Table S1. **The 13 items related to HIV knowledge**

| **HIV Knowledge** | **True** | **False** | **I don’t know** |
| --- | --- | --- | --- |
| If I eat with HIV-infected people, I will be infected with HIV |  |  |  |
| If I share needles with drug addicts, I will be infected with HIV |  |  |  |
| If I practice oral sex without condoms, I will be infected with HIV |  |  |  |
| Mosquito bites can transmit HIV |  |  |  |
| If I use condoms correctly at each insertion, I can avoid HIV infection |  |  |  |
| Removal of the penis from the vagina or anus before ejaculation can prevent HIV infection |  |  |  |
| Being with only one uninfected loyal partner can prevent HIV infection |  |  |  |
| All HIV-infected pregnant women give birth to HIV-infected children |  |  |  |
| People who use antibiotics are not infected |  |  |  |
| Examination results at 1 week after sexual intercourse can determine whether the person is infected with HIV |  |  |  |
| AIDS cannot be cured |  |  |  |
| Oral sex is much less likely to transmit HIV than anal intercourse |  |  |  |
| The risk of HIV infection can be reduced by the treatment of sexually transmitted diseases |  |  |  |

Each item has a correct answer with a score of 1 point, otherwise, a score of 0 point will be given.

Supplementary Table S2. **Sample characteristics at baseline between the excluded group and inclusive group**

| **Characteristics** | **Inclusive Group**  **(n=496)** | | **Excluded Group**  **(n=49)** | | ***χ2*** | ***p-*value** |
| --- | --- | --- | --- | --- | --- | --- |
| **n** | **%** | **n** | **%** |
| **Medication Mode** |  |  |  |  |  |  |
| Daily PrEP group | 213 | 42.94 | 22 | 44.90 | 0.0695 | 0.7921 |
| On-demand PrEP group | 283 | 57.06 | 27 | 55.10 |  |  |
| ***Social demographic characteristics*** |  |  |  |  |  |  |
| **Age** |  |  |  |  |  |  |
| 18-25 | 167 | 33.67 | 21 | 42.86 | 4.2075 | 0.1220 |
| 26-30 | 112 | 22.58 | 14 | 28.57 |  |  |
| ≥31 | 217 | 43.75 | 14 | 28.57 |  |  |
| **Area** |  |  |  |  |  |  |
| Urban | 369 | 74.40 | 39 | 79.59 | 0.6399 | 0.4237 |
| Rural | 127 | 25.60 | 10 | 20.41 |  |  |
| **Ethnic groups** |  |  |  |  |  |  |
| Han nationality | 442 | 89.11 | 44 | 89.80 | 0.0215 | 0.8833 |
| Other ethnic minorities | 54 | 10.89 | 5 | 10.20 |  |  |
| **Educational level**# |  |  |  |  |  |  |
| Junior high or below | 60 | 12.12 | 3 | 6.12 | 1.7277 | 0.4215 |
| Senior high | 139 | 28.08 | 16 | 32.65 |  |  |
| College or above | 296 | 59.80 | 30 | 61.22 |  |  |
| **Employment status**# |  |  |  |  |  |  |
| Employed | 393 | 79.39 | 32 | 65.31 | 5.212 | 0.074 |
| Students at school | 46 | 9.29 | 8 | 16.33 |  |  |
| Retired or unemployed | 56 | 11.31 | 9 | 18.37 |  |  |
| **Marital status** |  |  |  |  |  |  |
| Unmarried | 354 | 71.37 | 41 | 83.67 | 3.3841 | 0.1841 |
| Married | 88 | 17.74 | 5 | 10.20 |  |  |
| Divorce or widowhood | 54 | 10.89 | 3 | 6.12 |  |  |
| **Personal monthly income (RMB)**# |  |  |  |  |  |  |
| ≤3000 | 250 | 51.12 | 31 | 63.27 | 3.1522 | 0.2068 |
| 3001-5000 | 180 | 36.81 | 12 | 24.49 |  |  |
| ≥5001 | 59 | 12.07 | 6 | 12.24 |  |  |
| ***Sexual behavior characteristics*** |  |  |  |  |  |  |
| **The sex position during anal sexual intercourse with men**# |  |  |  |  |  |  |
| Only doing insertive anal sex "1" | 114 | 23.03 | 15 | 30.61 | 4.4945 | 0.3432 |
| Both but "1" mainly | 131 | 26.46 | 8 | 16.33 |  |  |
| Both equally | 131 | 26.46 | 12 | 24.49 |  |  |
| Both but “0” mainly | 76 | 15.35 | 7 | 14.29 |  |  |
| Only doing receptive anal sex "0" | 43 | 8.69 | 7 | 14.29 |  |  |
| **Temporary male sexual partners in the last six months**# |  |  |  |  |  |  |
| 0 | 67 | 13.65 | 2 | 4.08 | 4.2909 | 0.1170 |
| 1 | 150 | 30.55 | 14 | 28.57 |  |  |
| ≥2 | 274 | 55.80 | 33 | 67.35 |  |  |
| **Female sexual partners in the last six months**# |  |  |  |  |  |  |
| 0 | 411 | 84.57 | 42 | 87.50 | 0.7350 | 0.6925 |
| 1 | 69 | 14.20 | 5 | 10.42 |  |  |
| ≥2 | 6 | 1.23 | 1 | 2.08 |  |  |
| **Frequency of condom use when having anal sex with men**# |  |  |  |  |  |  |
| Always | 282 | 58.51 | 24 | 48.98 | 1.7391 | 0.4191 |
| Occasionally | 172 | 35.68 | 21 | 42.86 |  |  |
| Never | 28 | 5.81 | 4 | 8.16 |  |  |
| **Frequency of Internet-seeking sexual partners in the last 6 months**# |  |  |  |  |  |  |
| Often | 47 | 9.49 | 3 | 6.12 | 2.8030 | 0.2462 |
| Sometimes or occasionally | 348 | 70.30 | 40 | 81.63 |  |  |
| Never | 100 | 20.20 | 6 | 12.24 |  |  |
| **Whether a commercial sexual service in the past 6 month** |  |  |  |  |  |  |
| Yes | 38 | 7.66 | 2 | 4.08 | 0.8402 | 0.3593 |
| No | 458 | 92.34 | 47 | 95.92 |  |  |
| **Diagnosed with STD in the past six months**# |  |  |  |  |  |  |
| Yes | 54 | 10.95 |  |  |  |  |
| No | 439 | 89.05 |  |  |  |  |
| ***HIV knowledge and testing and counseling*** |  |  |  |  |  |  |
| **HIV voluntary testing** |  |  |  |  |  |  |
| **Yes** | 409 | 82.46 | 36 | 73.47 | 2.4058 | 0.1209 |
| No | 87 | 17.54 | 13 | 26.53 |  |  |
| **HIV voluntary counseling**# |  |  |  |  |  |  |
| Yes | 326 | 65.99 | 32 | 66.67 | 0.0089 | 0.9249 |
| No | 168 | 34.01 | 16 | 33.33 |  |  |
| **HIV knowledge score** |  |  |  |  |  |  |
| ≤11 | 231 | 46.57 | 21 | 42.86 | 0.2476 | 0.6187 |
| ＞11 | 265 | 53.43 | 28 | 57.14 |  |  |
| ***Substance use*** |  |  |  |  |  |  |
| **Frequency of alcohol use in the last month** |  |  |  |  |  |  |
| Daily | 17 | 3.43 | 0 | 0.00 | 4.6841 | 0.3213 |
| At least 3 times/week | 48 | 9.68 | 2 | 4.08 |  |  |
| At least 1 time/week | 80 | 16.13 | 6 | 12.24 |  |  |
| Less than 1 time/week | 201 | 40.52 | 23 | 46.94 |  |  |
| Never | 150 | 30.24 | 18 | 36.73 |  |  |
| **Whether illicit drugs (ecstasy, methamphetamine, k powder (ketamine), etc) used in the last half year**# |  |  |  |  |  |  |
| No | 472 | 96.72 | 47 | 95.92 | 0.0886 | 0.7659 |
| Yes | 16 | 3.28 | 2 | 4.08 |  |  |

* Rank sum test, and χ2 test was used for the rest. # indicates loss of data, and average missing rates of variables were below 0.9%. Bold values indicate statistical significance at *p* < 0.05.
